# Supplementary material for: Using a Vancomycin PBPK Model in Special Populations to Elucidate Case‐Based Clinical PK Observations
Source: PubMed Central journal article supplement — CPT Pharmacometrics Syst Pharmacol. 2018 Feb 15;7(4):237–50. doi: 10.1002/psp4.12279 (PMC5915605; doi:10.1002/psp4.12279), 2018-02-15
Supplement: PSP4-7-237-s003.pdf [file PSP4-7-237-s003.pdf]

| Substrate |  |
|-----------|--|
|-----------|--|

|                                |                 |
|--------------------------------|-----------------|
| Compound Name                  | Vancomycin      |
| Version number                 | Not applicable  |
| Compound Type                  | Small Molecule  |
| Route                          | Infusion        |
| Sub : Dose Units               | Dose (mg)       |
| Bolus Dose                     | 0.000           |
| Infusion Dose                  | 1000.000        |
| Infusion Duration (h)          | 1.000           |
| Start Day                      | 1.000           |
| Start Time                     | 9h0m            |
| Dosing Regimen                 | Single Dose     |
|                                |                 |
| PhysChem and Blood Binding     |                 |
|                                |                 |
| Mol Weight (g/mol)             | 1449.254        |
| log P                          | -3.100          |
| Compound Type                  | Ampholyte       |
| pKa 1                          | 2.180           |
| pKa 2                          | 8.890           |
| BP Input                       | User Input      |
| B/P                            | 0.550           |
| Haematocrit                    | 45.000          |
| fu Input                       | User            |
| fu                             | 0.450           |
| Reference Binding Component    | HSA             |
| Protein Reference Conc (g/L)   | 45.000          |
| % Bound to Lipoprotein         | 0.000           |
| % Bound to Lipoprotein (CV %)  | 0.000           |
|                                |                 |
| Absorption                     |                 |
|                                |                 |
|                                |                 |
| Distribution                   |                 |
|                                |                 |
| Distribution Model             | Full PBPK Model |
| Replacement Organ?             | No              |
| Organ Replaced                 | n/a             |
| User-defined Additional Organ  | No              |
| Type                           | n/a             |
| Vss mode                       | Predicted       |
| Prediction Method              | Method 1        |
| Concentration-dependent volume | No              |
| log Po:w                       | -3.100          |
| fut switch                     | Predicted       |
| fut value                      | 0.621           |

|                                          |                 |
|------------------------------------------|-----------------|
| logDvo:w (pH=7.4) switch                 | Predicted       |
| logDvo:w (pH=7.4) value                  | -11.530         |
| logP vo:w                                | Predicted       |
| logP vo:w value                          | -4.806          |
| Compound Type                            | Ampholyte       |
| pKa 1                                    | 2.180           |
| pKa 2                                    | 8.890           |
| B/P                                      | 0.550           |
| Haematocrit                              | 45.000          |
| fu                                       | 0.450           |
| Adipose Input Type                       | Predicted       |
| Adipose Value                            | 0.086           |
| Bone Input Type                          | Predicted       |
| Bone Value                               | 0.337           |
| Brain Input Type                         | Predicted       |
| Brain Value                              | 0.609           |
| Gut Input Type                           | Predicted       |
| Gut Value                                | 0.556           |
| Heart Input Type                         | Predicted       |
| Heart Value                              | 0.587           |
| Kidney Input Type                        | Predicted       |
| Kidney Value                             | 0.606           |
| Liver Input Type                         | Predicted       |
| Liver Value                              | 0.584           |
| Lung Input Type                          | Predicted       |
| Lung Value                               | 0.625           |
| Muscle Input Type                        | Predicted       |
| Muscle Value                             | 0.585           |
| Skin Input Type                          | Predicted       |
| Skin Value                               | 0.554           |
| Spleen Input Type                        | Predicted       |
| Spleen Value                             | 0.610           |
| Pancreas Input Type                      | Predicted       |
| Pancreas Value                           | 0.604           |
| Kp Scalar Value                          | 1.000           |
|                                          |                 |
| Elimination                              |                 |
|                                          |                 |
| Allometric Scaling                       | Not Used        |
|                                          |                 |
| Clearance Type                           | Enzyme Kinetics |
| FI Correction                            | Not used        |
| PLR Correction                           | Not Used        |
| In vitro metabolic system                | Recombinant     |
|                                          |                 |
| Feed formed renal metabolite into kidney | No              |
|                                          |                 |

|                                                                       |                        |
|-----------------------------------------------------------------------|------------------------|
| <b>Use Allelic variants for Enzyme 1</b>                              | <b>No</b>              |
| <b>Enzyme</b>                                                         | <b>CYP2C9</b>          |
|                                                                       |                        |
| <b>Use Allelic variants for Enzyme 2</b>                              | <b>No</b>              |
| <b>Enzyme</b>                                                         | <b>CYP1A2</b>          |
|                                                                       |                        |
| <b>Ontogeny Profile</b>                                               | <b>No Profile Used</b> |
| <b>Biliary CLint (Hep) (<math>\mu\text{L}/\text{min}/10^6</math>)</b> | <b>0.180</b>           |
| <b>CV Biliary CLint (Hep) (%)</b>                                     | <b>30.000</b>          |
| <b>Ontogeny Profile</b>                                               | <b>No Profile Used</b> |
| <b>Active Uptake into Hepatocyte</b>                                  | <b>1.000</b>           |
| <b>CL R (L/h)</b>                                                     | <b>5.730</b>           |
